# Supplementary material for: Cross-species conserved miRNA as biomarker of radiation injury over a wide dose range using nonhuman primate model
Source: PubMed Central journal article supplement (PMC11581275; doi:10.1371/journal.pone.0311379), 2024-11-21

S3 Fig.

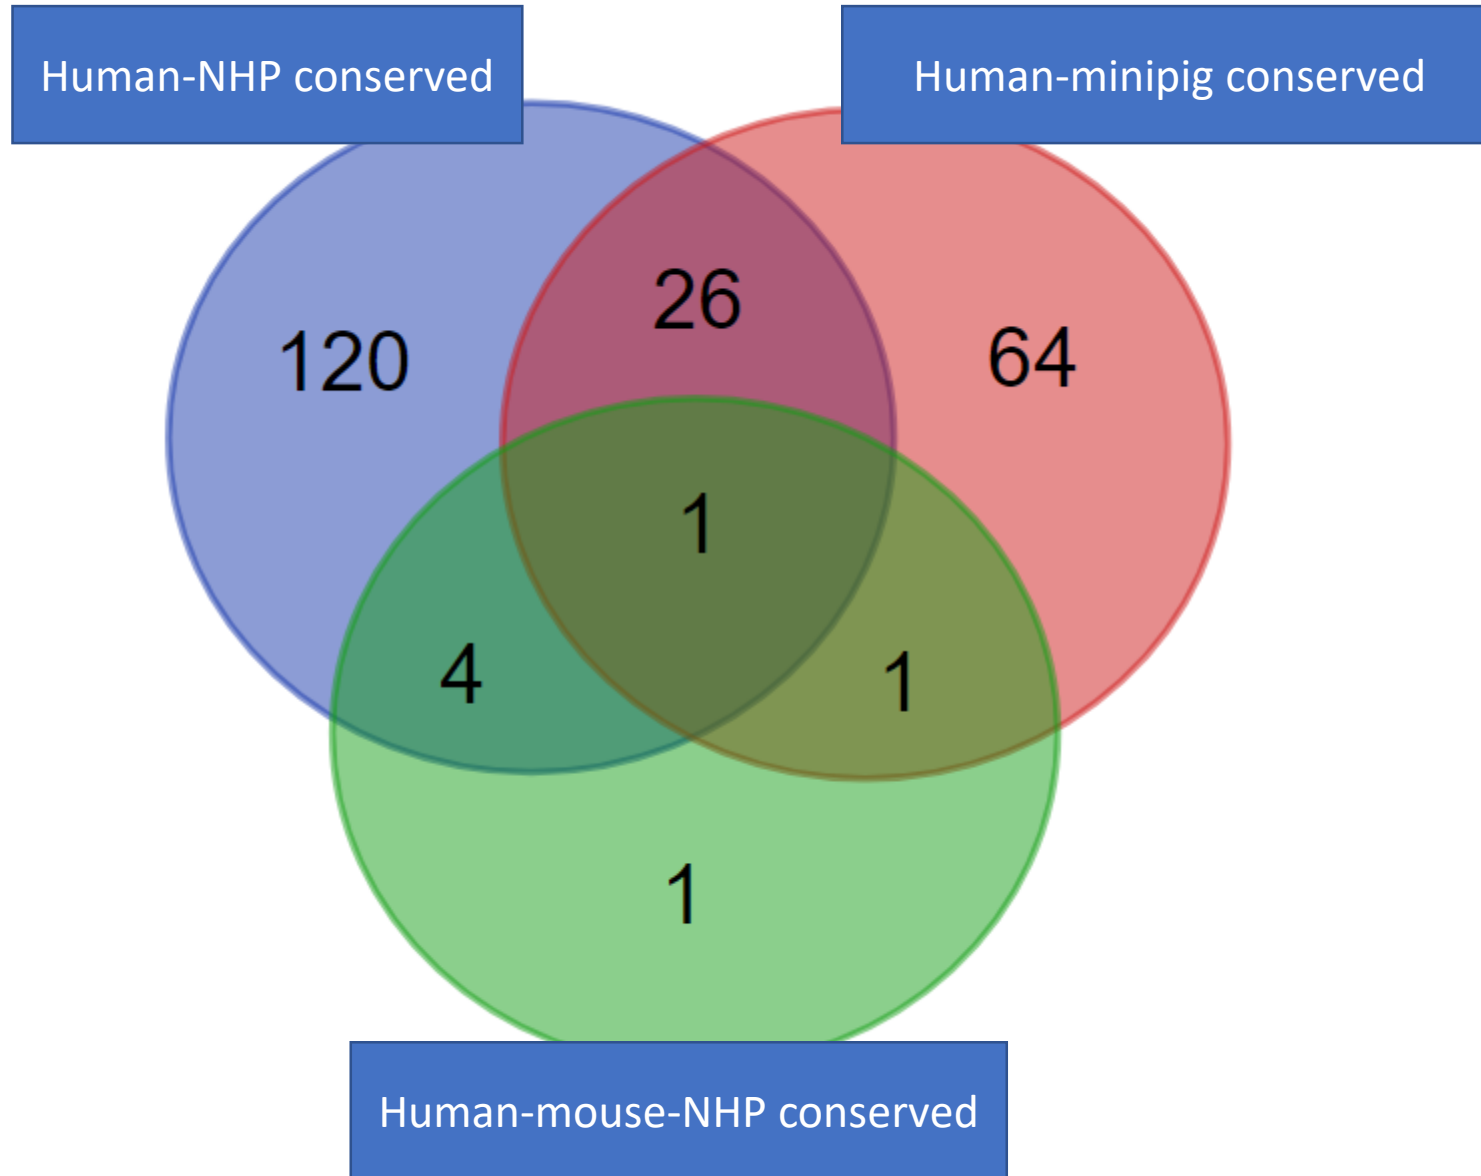

Supplement: pone.0311379.s003.pdf [file pone.0311379.s003.pdf]
