# Supplementary material for: Cross-species conserved miRNA as biomarker of radiation injury over a wide dose range using nonhuman primate model
Source: PubMed Central journal article supplement (PMC11581275; doi:10.1371/journal.pone.0311379), 2024-11-21
Supplement: pone.0311379.s005.pdf [file pone.0311379.s005.pdf]

S2 Table. List of miRNAs linked to major bionetworks

| TBI*RD      |                   |                                        |
|-------------|-------------------|----------------------------------------|
| Apoptosis   | Invasion of cells | Cell proliferation of tumor cell lines |
| let-7a-5p   | let-7a-5p         | let-7a-5p                              |
| miR-130a-3p | miR-141-3p        | miR-130a-3p                            |
| miR-141-3p  | miR-16-5p         | miR-141-3p                             |
| miR-16-5p   | miR-223-3p        | miR-16-5p                              |
| miR-223-3p  | miR-23a-3p        | miR-223-3p                             |
| miR-23a-3p  | miR-30c-5p        | miR-23a-3p                             |
| miR-30c-5p  | miR-451a          | miR-30a-3p                             |
| miR-451a    | miR-654-3p        | miR-30c-5p                             |
| miR-654-3p  | miR-92a-3p        | miR-451a                               |
|             |                   | miR-485-5p                             |
|             |                   | miR-654-3p                             |
|             |                   | miR-92a-3p                             |

| RRiF              |                              |                   |                               |
|-------------------|------------------------------|-------------------|-------------------------------|
| Invasion of cells | Invasion of tumor cell lines | Quantity of cells | Quantity of muscle cell lines |
| let-7a-5p         | miR-125b-5p                  | miR-125b-5p       | miR-125b-5p                   |
| miR-125b-5p       | miR-16-5p                    | miR-16-5p         | miR-361-3p                    |
| miR-16-5p         | miR-23a-3p                   | miR-361-3p        | miR-486-5p                    |
| miR-23a-3p        | miR-451a                     | miR-451a          | miR-574-3p                    |
| miR-451a          | miR-92a-3p                   | miR-486-5p        |                               |
| miR-92a-3p        |                              | miR-574-3p        |                               |
|                   |                              | miR-92a-3p        |                               |

| TBI*RRiF                               |
|----------------------------------------|
| Cell proliferation of tumor cell lines |
| let-7a-5p                              |
| miR-181a-5p                            |
| miR-199a-5p                            |
| miR-23a-3p                             |
| miR-380-3p                             |
| miR-409-3p                             |
| miR-532-3p                             |
| miR-541-3p                             |
| miR-654-3p                             |
| miR-889-3p                             |
| miR-92a-3p                             |
