# Supplementary material for: Cross-species conserved miRNA as biomarker of radiation injury over a wide dose range using nonhuman primate model
Source: PubMed Central journal article supplement (PMC11581275; doi:10.1371/journal.pone.0311379), 2024-11-21
Supplement: pone.0311379.s008.pdf [file pone.0311379.s008.pdf]

S5 Table. The miRNA list linked to the Venn diagram Figure S3

|   |                           | A-B-C       | A-B         | A-C        | B-C        | A           | B            | C           |
|---|---------------------------|-------------|-------------|------------|------------|-------------|--------------|-------------|
|   |                           | miR-133a-3p | miR-429     | miR-215-5p | miR-126-5p | let-7f-5p   | miR-708-3p   | miR-133b-3p |
| A | Human-NHP conserved       |             | miR-142-3p  | miR-150-5p |            | miR-92a-3p  | miR-133a-5p  |             |
| B | Human-minipig conserved   |             | miR-424-5p  | miR-30a-5p |            | miR-665     | miR-221-5p   |             |
| C | Human-mouse-NHP conserved |             | miR-143-3p  | miR-375-3p |            | miR-363-3p  | miR-671-5p   |             |
|   |                           |             | miR-374b-5p |            |            | miR-548h-3p | miR-361-5p   |             |
|   |                           |             | miR-22-3p   |            |            | miR-128-3p  | miR-148a-5p  |             |
|   |                           |             | miR-1306-5p |            |            | let-7i-5p   | miR-92b-5p   |             |
|   |                           |             | miR-296-5p  |            |            | miR-152-3p  | miR-139-5p   |             |
|   |                           |             | miR-30c-5p  |            |            | miR-654-3p  | miR-30c-1-3p |             |
|   |                           |             | miR-28-3p   |            |            | miR-369-5p  | miR-374a-5p  |             |
|   |                           |             | miR-424-3p  |            |            | miR-760     | miR-1306-3p  |             |
|   |                           |             | miR-532-3p  |            |            | let-7a-5p   | miR-145-5p   |             |
|   |                           |             | miR-1296-5p |            |            | miR-197-3p  | miR-30e-3p   |             |
|   |                           |             | miR-361-3p  |            |            | miR-381-3p  | miR-17-3p    |             |
|   |                           |             | miR-671-3p  |            |            | miR-23a-3p  | miR-145-3p   |             |
|   |                           |             | miR-193a-3p |            |            | miR-106b-5p | miR-676-3p   |             |
|   |                           |             | miR-331-5p  |            |            | miR-185-5p  | miR-202-3p   |             |
|   |                           |             | miR-27b-3p  |            |            | miR-376c-3p | miR-455-3p   |             |
|   |                           |             | miR-221-3p  |            |            | miR-369-3p  | miR-425-3p   |             |
|   |                           |             | let-7d-5p   |            |            | miR-499a-5p | miR-17-5p    |             |
|   |                           |             | miR-30a-3p  |            |            | miR-378a-3p | miR-24-3p    |             |
|   |                           |             | miR-331-3p  |            |            | miR-15b-5p  | miR-432-5p   |             |
|   |                           |             | miR-376a-3p |            |            | miR-485-5p  | miR-6782-3p  |             |
|   |                           |             | miR-199a-5p |            |            | miR-550a-5p | miR-148b-3p  |             |
|   |                           |             | miR-425-5p  |            |            | miR-320b    | miR-217      |             |
|   |                           |             | miR-30b-5p  |            |            | miR-210-3p  | miR-27b-5p   |             |
|   |                           |             |             |            |            | miR-183-5p  | miR-339-3p   |             |
|   |                           |             |             |            |            | miR-141-3p  | miR-345-5p   |             |
|   |                           |             |             |            |            | miR-301b-3p | miR-345-3p   |             |
|   |                           |             |             |            |            | miR-210-5p  | miR-769-5p   |             |
|   |                           |             |             |            |            | miR-362-3p  | miR-206      |             |
|   |                           |             |             |            |            | miR-199a-3p | miR-542-3p   |             |
|   |                           |             |             |            |            | miR-29c-3p  | miR-708-5p   |             |

|  |  |  |  |  |  |               |             |  |
|--|--|--|--|--|--|---------------|-------------|--|
|  |  |  |  |  |  | miR-125b-1-3p | miR-148a-3p |  |
|  |  |  |  |  |  | miR-136-5p    | miR-455-5p  |  |
|  |  |  |  |  |  | miR-26a-5p    | miR-28-5p   |  |
|  |  |  |  |  |  | miR-18a-3p    | miR-296-3p  |  |
|  |  |  |  |  |  | miR-195-5p    | miR-885-5p  |  |
|  |  |  |  |  |  | miR-130b-5p   | miR-155-5p  |  |
|  |  |  |  |  |  | let-7d-3p     | miR-24-1-5p |  |
|  |  |  |  |  |  | miR-125b-5p   | miR-193a-5p |  |
|  |  |  |  |  |  | miR-1185-1-3p | miR-148b-5p |  |
|  |  |  |  |  |  | miR-550a-3p   | miR-769-3p  |  |
|  |  |  |  |  |  | miR-34a-5p    | miR-142-5p  |  |
|  |  |  |  |  |  | miR-598-3p    | miR-532-5p  |  |
|  |  |  |  |  |  | miR-505-3p    | miR-218-5p  |  |
|  |  |  |  |  |  | let-7e-5p     | miR-190b    |  |
|  |  |  |  |  |  | miR-574-3p    | miR-184     |  |
|  |  |  |  |  |  | let-7g-5p     | miR-542-5p  |  |
|  |  |  |  |  |  | miR-21-5p     | miR-490-3p  |  |
|  |  |  |  |  |  | miR-4446-3p   | miR-181d-5p |  |
|  |  |  |  |  |  | miR-342-3p    | miR-450b-5p |  |
|  |  |  |  |  |  | miR-203a-3p   | miR-885-3p  |  |
|  |  |  |  |  |  | miR-106b-3p   | miR-545-5p  |  |
|  |  |  |  |  |  | miR-301a-3p   | miR-199b-5p |  |
|  |  |  |  |  |  | miR-125b-2-3p | miR-326     |  |
|  |  |  |  |  |  | miR-652-3p    | miR-545-3p  |  |
|  |  |  |  |  |  | miR-380-3p    | miR-96-5p   |  |
|  |  |  |  |  |  | miR-25-3p     | miR-374a-3p |  |
|  |  |  |  |  |  | miR-92b-3p    | miR-374b-3p |  |
|  |  |  |  |  |  | miR-493-5p    | miR-22-5p   |  |
|  |  |  |  |  |  | miR-1260b     | miR-139-3p  |  |
|  |  |  |  |  |  | miR-411-5p    | miR-140-5p  |  |
|  |  |  |  |  |  | miR-376b-3p   | miR-133b    |  |
|  |  |  |  |  |  | miR-193b-3p   |             |  |
|  |  |  |  |  |  | miR-192-5p    |             |  |
|  |  |  |  |  |  | miR-10a-5p    |             |  |
|  |  |  |  |  |  | miR-378g      |             |  |

|  |  |  |  |  |  |             |  |  |
|--|--|--|--|--|--|-------------|--|--|
|  |  |  |  |  |  | let-7b-3p   |  |  |
|  |  |  |  |  |  | let-7a-3p   |  |  |
|  |  |  |  |  |  | miR-377-3p  |  |  |
|  |  |  |  |  |  | let-7g-3p   |  |  |
|  |  |  |  |  |  | miR-423-5p  |  |  |
|  |  |  |  |  |  | miR-493-3p  |  |  |
|  |  |  |  |  |  | miR-3122    |  |  |
|  |  |  |  |  |  | miR-487b-3p |  |  |
|  |  |  |  |  |  | miR-590-3p  |  |  |
|  |  |  |  |  |  | miR-16-2-3p |  |  |
|  |  |  |  |  |  | miR-654-5p  |  |  |
|  |  |  |  |  |  | let-7c-5p   |  |  |
|  |  |  |  |  |  | miR-101-5p  |  |  |
|  |  |  |  |  |  | miR-214-3p  |  |  |
|  |  |  |  |  |  | miR-486-5p  |  |  |
|  |  |  |  |  |  | miR-500a-3p |  |  |
|  |  |  |  |  |  | miR-223-3p  |  |  |
|  |  |  |  |  |  | miR-451a    |  |  |
|  |  |  |  |  |  | miR-187-3p  |  |  |
|  |  |  |  |  |  | miR-205-5p  |  |  |
|  |  |  |  |  |  | miR-181c-5p |  |  |
|  |  |  |  |  |  | miR-1180-3p |  |  |
|  |  |  |  |  |  | miR-181a-5p |  |  |
|  |  |  |  |  |  | miR-93-3p   |  |  |
|  |  |  |  |  |  | miR-636     |  |  |
|  |  |  |  |  |  | miR-423-3p  |  |  |
|  |  |  |  |  |  | miR-484     |  |  |
|  |  |  |  |  |  | miR-942-5p  |  |  |
|  |  |  |  |  |  | miR-140-3p  |  |  |
|  |  |  |  |  |  | miR-101-3p  |  |  |
|  |  |  |  |  |  | miR-21-3p   |  |  |
|  |  |  |  |  |  | miR-409-3p  |  |  |
|  |  |  |  |  |  | miR-485-3p  |  |  |
|  |  |  |  |  |  | miR-186-5p  |  |  |
|  |  |  |  |  |  | let-7f-1-3p |  |  |

|  |  |  |  |  |  |             |  |  |
|--|--|--|--|--|--|-------------|--|--|
|  |  |  |  |  |  | miR-543     |  |  |
|  |  |  |  |  |  | miR-30d-3p  |  |  |
|  |  |  |  |  |  | miR-338-5p  |  |  |
|  |  |  |  |  |  | miR-433-3p  |  |  |
|  |  |  |  |  |  | miR-324-3p  |  |  |
|  |  |  |  |  |  | miR-328-3p  |  |  |
|  |  |  |  |  |  | miR-146b-3p |  |  |
|  |  |  |  |  |  | miR-1247-5p |  |  |
|  |  |  |  |  |  | miR-378f    |  |  |
|  |  |  |  |  |  | miR-1271-3p |  |  |
|  |  |  |  |  |  | miR-200a-3p |  |  |
|  |  |  |  |  |  | miR-29a-3p  |  |  |
|  |  |  |  |  |  | miR-874-3p  |  |  |
|  |  |  |  |  |  | miR-26b-5p  |  |  |
|  |  |  |  |  |  | miR-182-5p  |  |  |
|  |  |  |  |  |  | miR-889-3p  |  |  |
|  |  |  |  |  |  | miR-10a-3p  |  |  |
